# Supplementary material for: Effect of the alkyl spacer length on the electrical performance of diketopyrrolopyrrole-thiophene vinylene thiophene polymer semiconductors
Source: Royal Society of Chemistry journal article supplement (doi:10.1039/c5tc02565f), 2015-01-01
Supplement: c5tc02565f1.pdf [file c5tc02565f1.pdf]

**Supplementary information**

**Effect of Alkyl Spacer Length on the Electrical Performance of  
Diketopyrrolopyrrole-Thiophene Vinylene Thiophene Polymer  
Semiconductors**

Hojeong Yu,<sup>a,d</sup> Kwang Hun Park,<sup>b</sup> Inho Song,<sup>a</sup> Myeong-Jong Kim,<sup>b</sup>

Yun-Hi Kim<sup>c,\*</sup>, Joon Hak Oh<sup>a,\*</sup>

<sup>a</sup>Department of Chemical Engineering, Pohang University of Science and Technology  
(POSTECH), Pohang, Gyeongbuk 790-784, South Korea

<sup>b</sup>School of Materials Science and Engineering and Engineering Research Institute,  
Gyeongsang National University, Jinju, Gyeongnam 660-701, South Korea

<sup>c</sup>Department of Chemistry and Engineering Research Institute, Gyeongsang National  
University, Jinju, Gyeongnam 660-701, South Korea

<sup>d</sup>School of Energy and Chemical Engineering, Ulsan National Institute of Science and  
Technology (UNIST), Ulsan 689-798, South Korea.

**Keywords:** odd-even effects, alkyl spacer groups, alkyl side chains, diketopyrrolopyrrole,  
organic thin-film transistors

| <b>Table of Contents</b>                                                                                                           | <b>Page number</b> |
|------------------------------------------------------------------------------------------------------------------------------------|--------------------|
| S1. Materials and Methods                                                                                                          | S3-S6              |
| Figure S1. <sup>1</sup> H-NMR of DPP-TVT polymers                                                                                  | S7-S10             |
| Figure S2. Quantitative elemental analysis of DPP-TVT polymers                                                                     | S11                |
| Figure S3. TGA thermograms of DPP-TVT polymers                                                                                     | S12                |
| Figure S4. DSC thermograms of DPP-TVT polymers                                                                                     | S13                |
| Figure S5. Cyclovoltammetry plots of DPP-TVT polymers in acetonitrile                                                              | S14                |
| Figure S6. Out-of-plane X-ray diffraction (XRD) diffractogram profiles of the as-cast DPP-TVT polymer films.                       | S15                |
| Figure S7. AFM phase image of DPP-TVT polymer films annealed at 200 °C                                                             | S16                |
| Figure S8. Transfer and output curves of DPP-TVT FETs obtained from solution-shearing                                              | S17                |
| Figure S9. Photo-response test of the 29-DPP-TVT FETs upon on-and-off switching of polychromatic light at the transistor off-state | S18                |
| Table S1. TGA and DSC data of DPP-TVT polymers                                                                                     | S19                |
| Table S2. Peak assignments for the out-of-plane XRD intensity profiles obtained from the as-cast DPP-TVT polymer films             | S20                |
| References                                                                                                                         | S21                |

All chemicals were purchased from Aldrich and Alfa : thiophene-2-carbonitrile, dimethyl succinate, 11-(bromomethyl)tricosane, DMF, THF, NBS, n-BuLi, and were used without further purification. 3,6-Bis(5-bromothiophen-2-yl)-2,5-bis(2-decyltetradecyl)pyrrolo[3,4-c]pyrrole-1,4(2H,5H)-dione<sup>S1</sup>, (E)-1,2-di(thiophen-2-yl)ethene<sup>S2</sup>, and ((2-decylpentadecyl)bromide, (2-decylhexadecyl)bromide, (2-decylheptadecyl)bromide, (2-decyloctadecyl)bromide, (2-decylnonadecyl)bromide, (2-decylacosyl)bromide, (2-decylhenicosyl)bromide, (2-decyltricosyl)bromide) were synthesized via published literature procedures.<sup>S3</sup>

S3

### General Procedure for Stille Polymerization and Polymer Purification

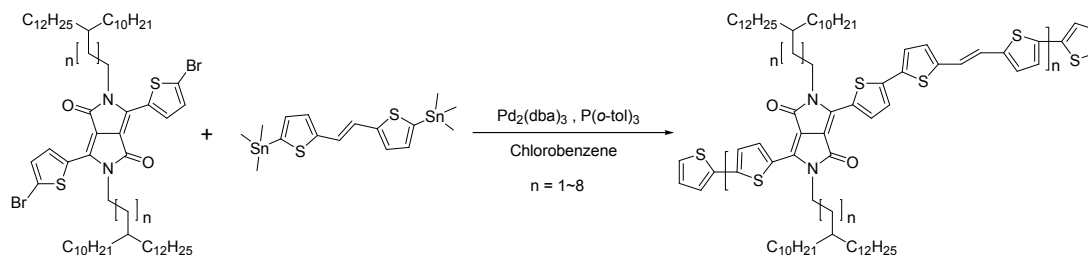

### Synthesis of P-25-DPP-TVT

The polymer was prepared using a palladium-catalyzed Stille coupling reaction. In a Schlenk flask 25-DPPBr<sup>[3]</sup> (0.5 g, 0.4 mmol) and 1,2-(E)-bis(5-(trimethylstannyl)thiophene-2-yl)ethene (0.22 g, 0.4 mmol) were dissolved in dry chlorobenzene (7.5 mL). After degassing under nitrogen for 60 min,  $\text{Pd}_2(\text{dba})_3$  (8 mg) and  $\text{P}(o\text{Tol})_3$  (11 mg) were added to the mixture, which was then stirred for 48 h at 110 °C. The end-capping was carried out by 2-bromothiophene and tributyl(thiophen-2-yl)stannane were injected into the reaction mixture for end-capping, and the solution was stirred for 6 h after each addition. The polymer was precipitated in methanol. The crude polymer was collected by filtration and purified by Soxhlet extraction with methanol, acetone, hexane, toluene, and chloroform, successively. The final product, P-25-DPP-TVTS was obtained by precipitation in methanol. Yield : 0.46g.  $^1\text{H-NMR}$  (500 MHz,  $\text{CDCl}_3$ , ppm):  $\delta$ 8.98 (broad, 4H), 7.49-6.61 (broad, 6H), 4.07 (broad, 4H), 1.96-1.26 (broad, 86H), 0.88 (broad, 12H).

### Synthesis of P-26-DPP-TVT

The synthetic procedure is similar as described for P-25-DPP-TVT. Yield : 0.45g.  $^1\text{H-NMR}$  (500 MHz,  $\text{CDCl}_3$ , ppm):  $\delta$ 9.00 (broad, 4H), 7.49-6.58 (broad, 6H), 4.08 (broad, 4H), 2.00-1.23 (broad, 90H), 0.88 (broad, 12H).

#### Synthesis of P-27-DPP-TVT

The synthetic procedure is similar as described for P-25-DPP-TVT. Yield : 0.44g. <sup>1</sup>H-NMR (500 MHz, CDCl<sub>3</sub>, ppm): δ8.96 (broad, 4H), 7.46-6.28 (broad, 6H), 4.10 (broad, 4H), 2.04-1.24 (broad, 94H), 0.86 (broad, 12H).

#### Synthesis of P-28-DPP-TVT

The synthetic procedure is similar as described for P-25-DPP-TVT. Yield : 0.47g. <sup>1</sup>H-NMR (500 MHz, CDCl<sub>3</sub>, ppm): δ8.97 (broad, 4H), 7.39-6.87 (broad, 6H), 4.1 (broad, 4H), 1.81-1.26 (broad, 98H), 0.88 (broad, 12H).

#### Synthesis of P-29-DPP-TVT

The synthetic procedure is similar as described for P-25-DPP-TVT. Yield : 0.42g. <sup>1</sup>H-NMR (500 MHz, CDCl<sub>3</sub>, ppm): δ8.86 (broad, 4H), 7.49-6.98 (broad, 6H), 4.11 (broad, 4H), 2.07-1.27 (broad, 102H), 0.91 (broad, 12H).

#### Synthesis of P-30-DPP-TVT

The synthetic procedure is similar as described for P-25-DPP-TVT. Yield : 0.45g. <sup>1</sup>H-NMR (500 MHz, CDCl<sub>3</sub>, ppm): δ8.86 (broad, 4H), 7.39-6.84 (broad, 6H), 4.04 (broad, 4H), 1.72-1.28 (broad, 106H), 0.81 (broad, 12H).

#### Synthesis of P-31-DPP-TVT

The synthetic procedure is similar as described for P-25-DPP-TVT. Yield : 0.43g. <sup>1</sup>H-NMR (500 MHz, CDCl<sub>3</sub>, ppm): δ8.90 (broad, 4H), 7.46-6.93 (broad, 6H), 4.09 (broad, 4H), 2.04-1.24 (broad, 110H), 0.88 (broad, 12H).

### Synthesis of P-32-DPP-TVT

The synthetic procedure is similar as described for P-25-DPP-TVT. Yield: 0.41g. <sup>1</sup>H-NMR (500 MHz, CDCl<sub>3</sub>, ppm): δ8.88 (broad, 4H), 7.54-6.26 (broad, 6H), 4.04 (broad, 4H), 2.03-1.31 (broad, 114H), 0.89 (broad, 12H).

## 25-DPP-TVT

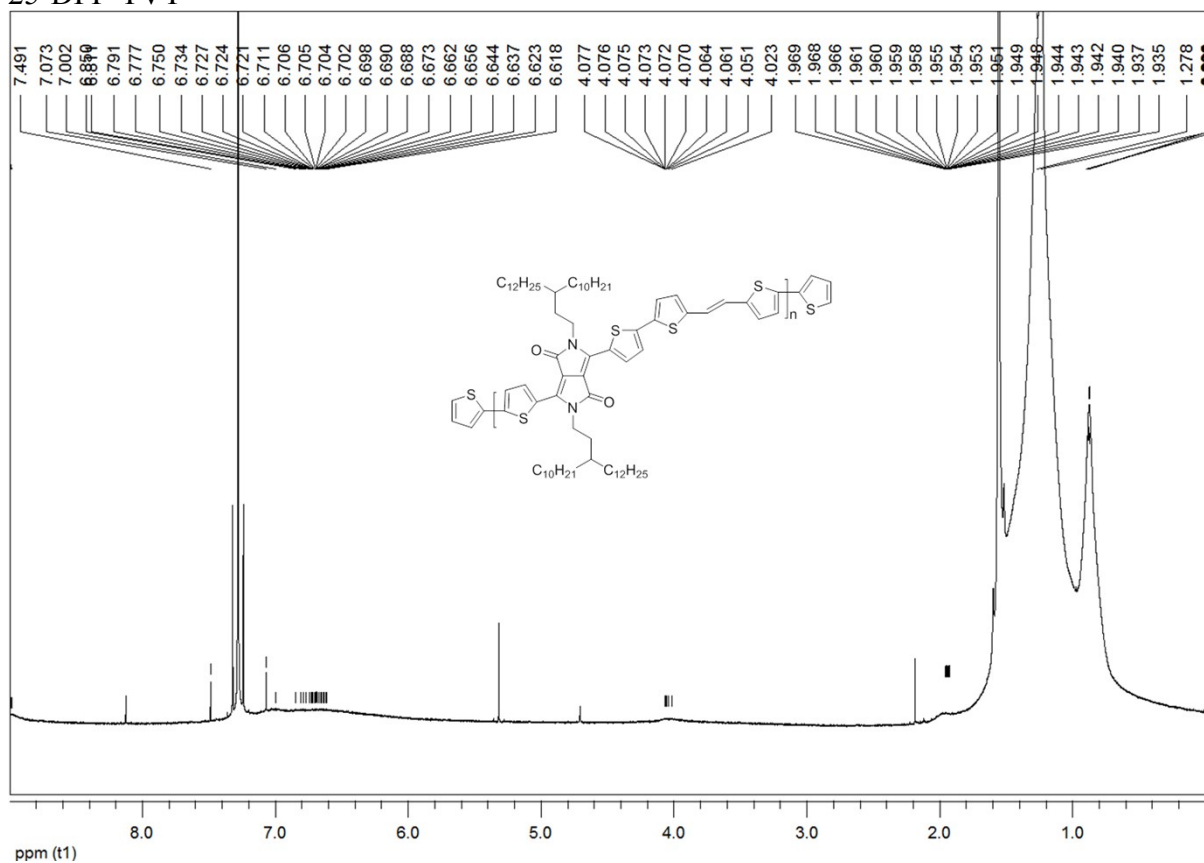

## 26-DPP-TVT

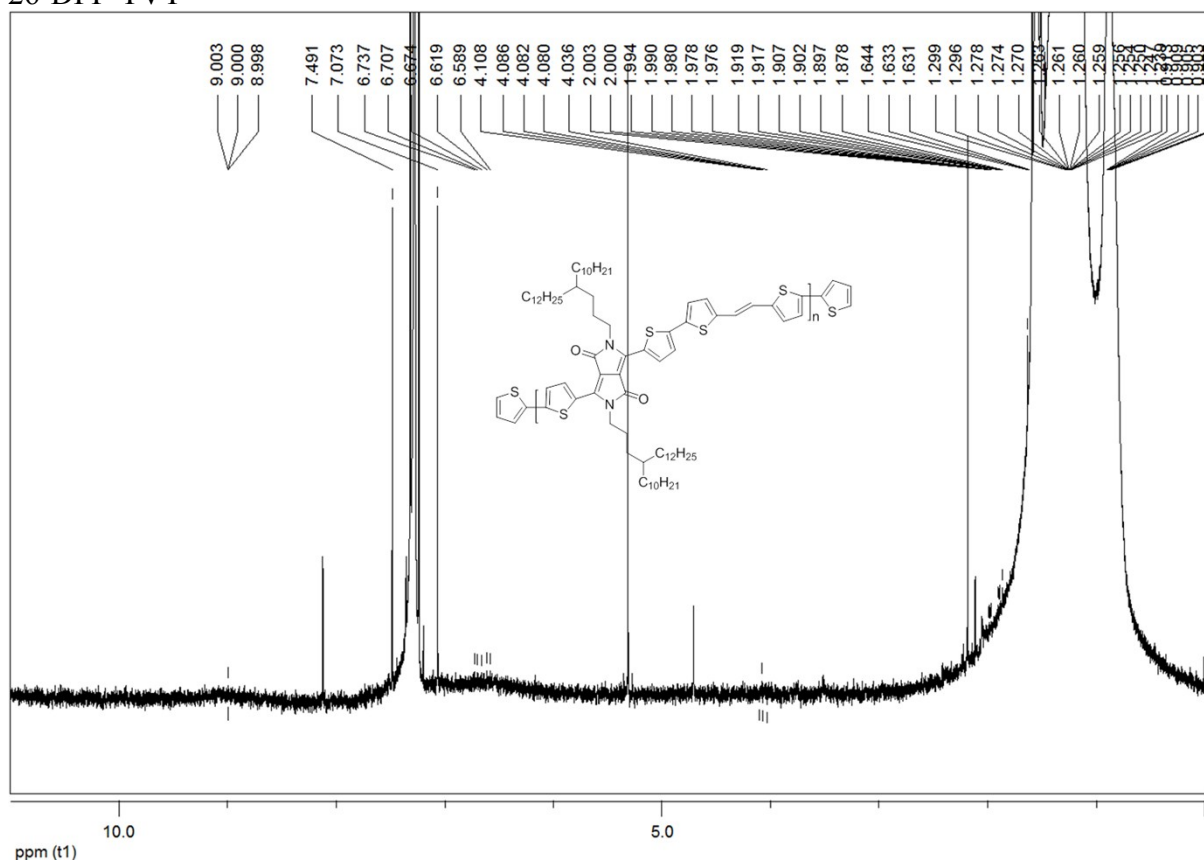

# 27-DPP-TVT

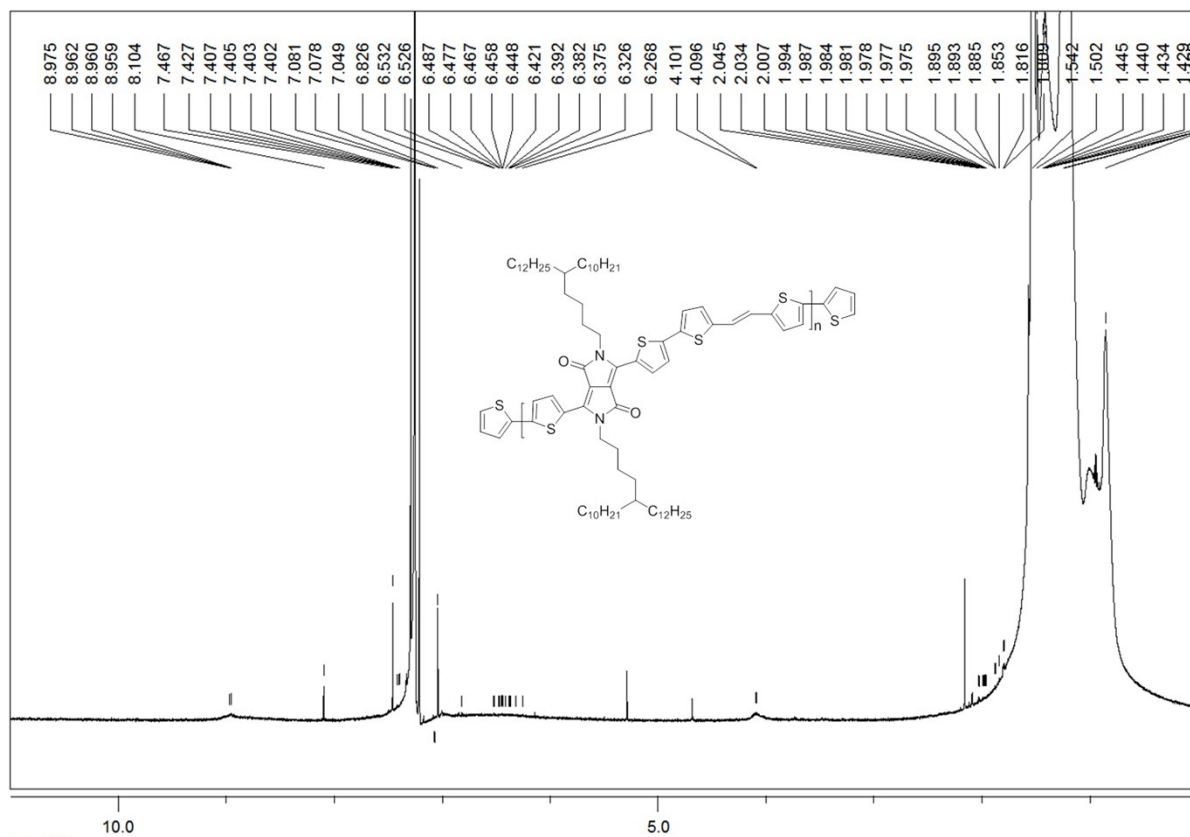

# 28-DPP-TVT

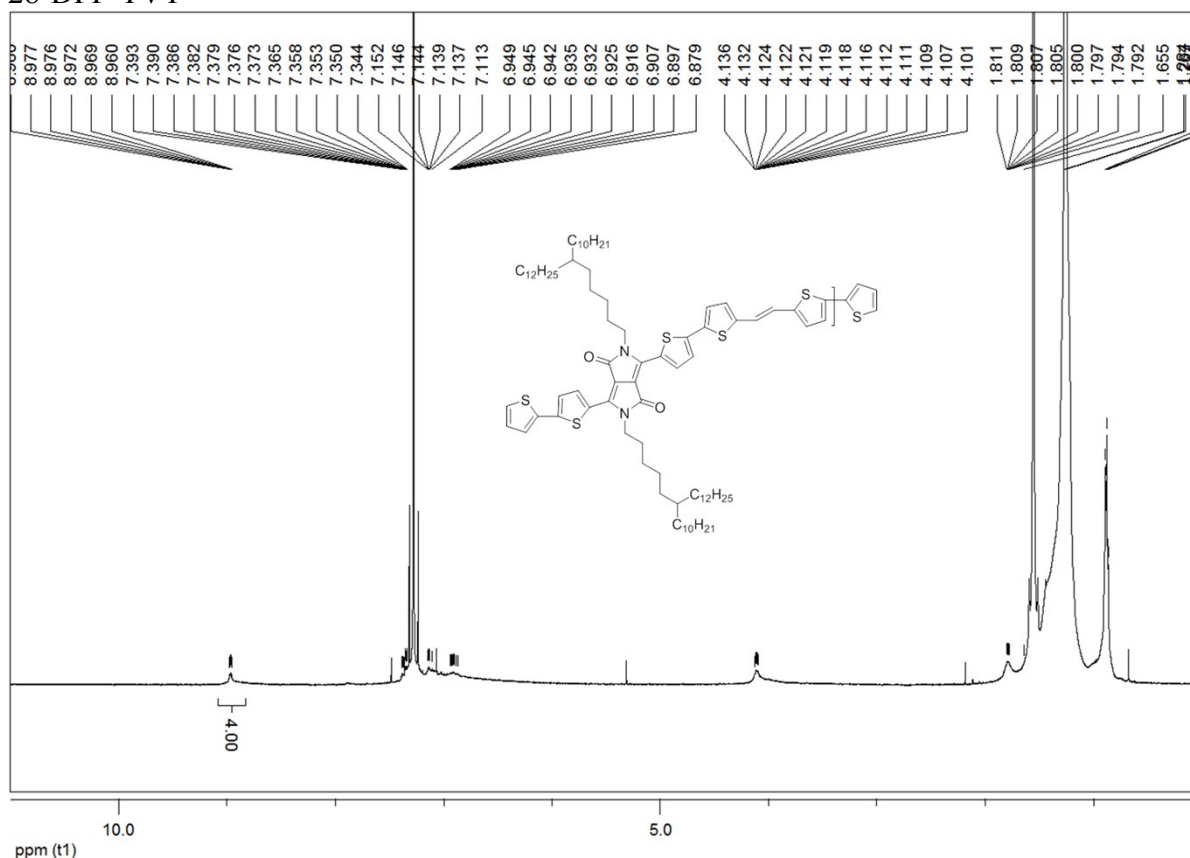



# 29-DPP-TVT

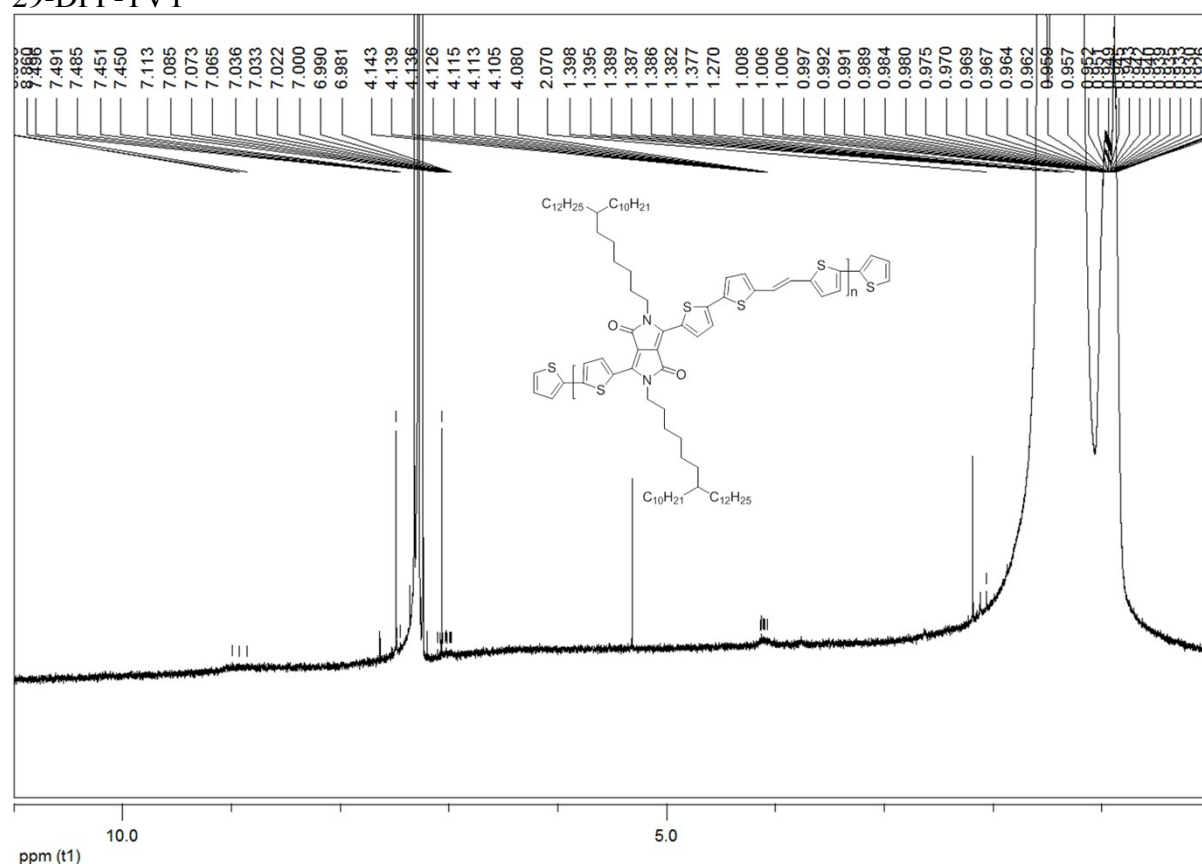

# 30-DPP-TVT

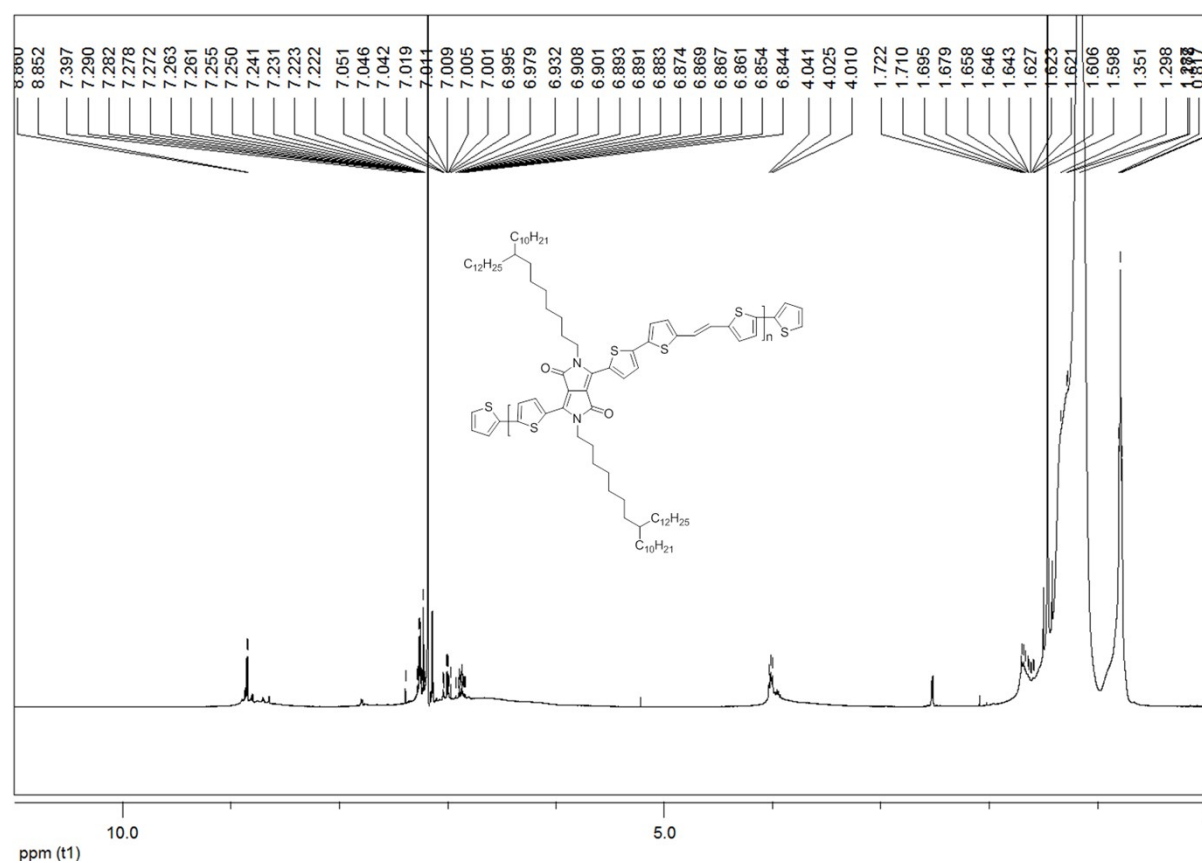

### 31-DPP-TVT

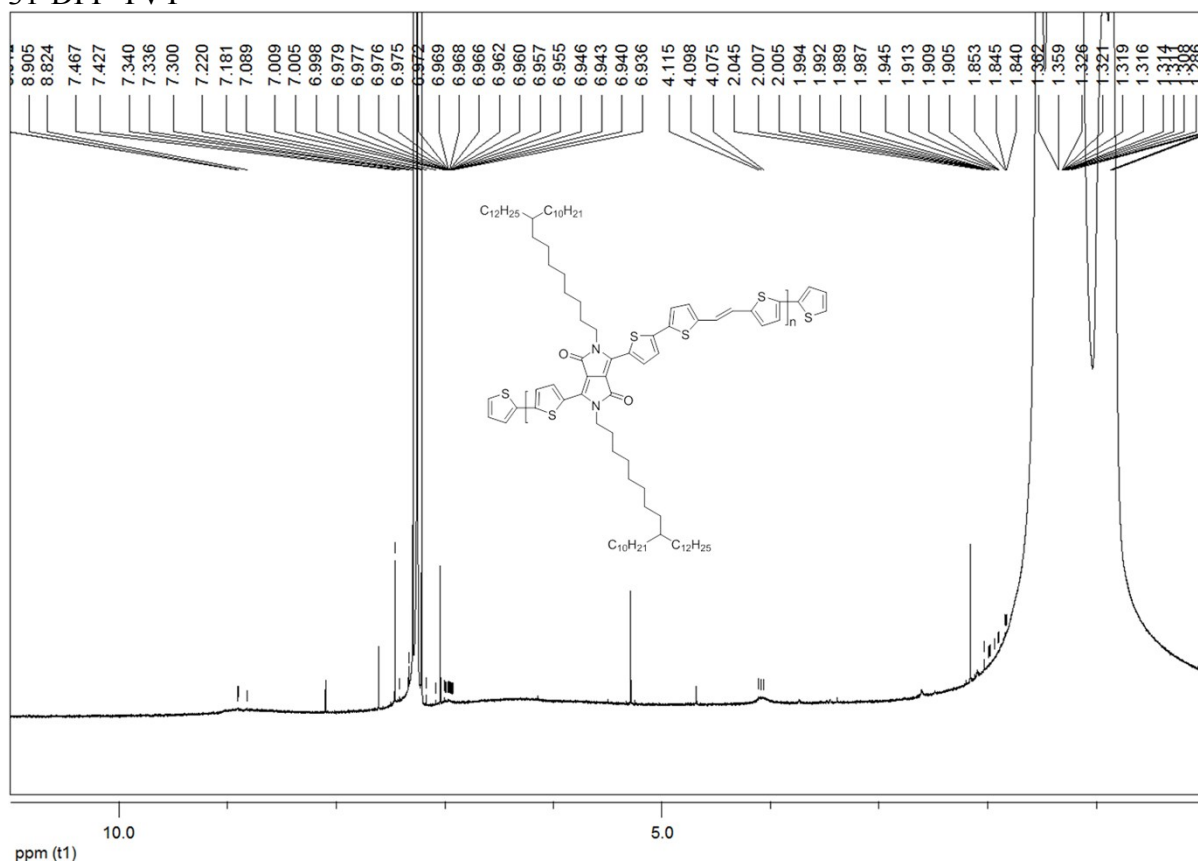

### 32-DPP-TVT

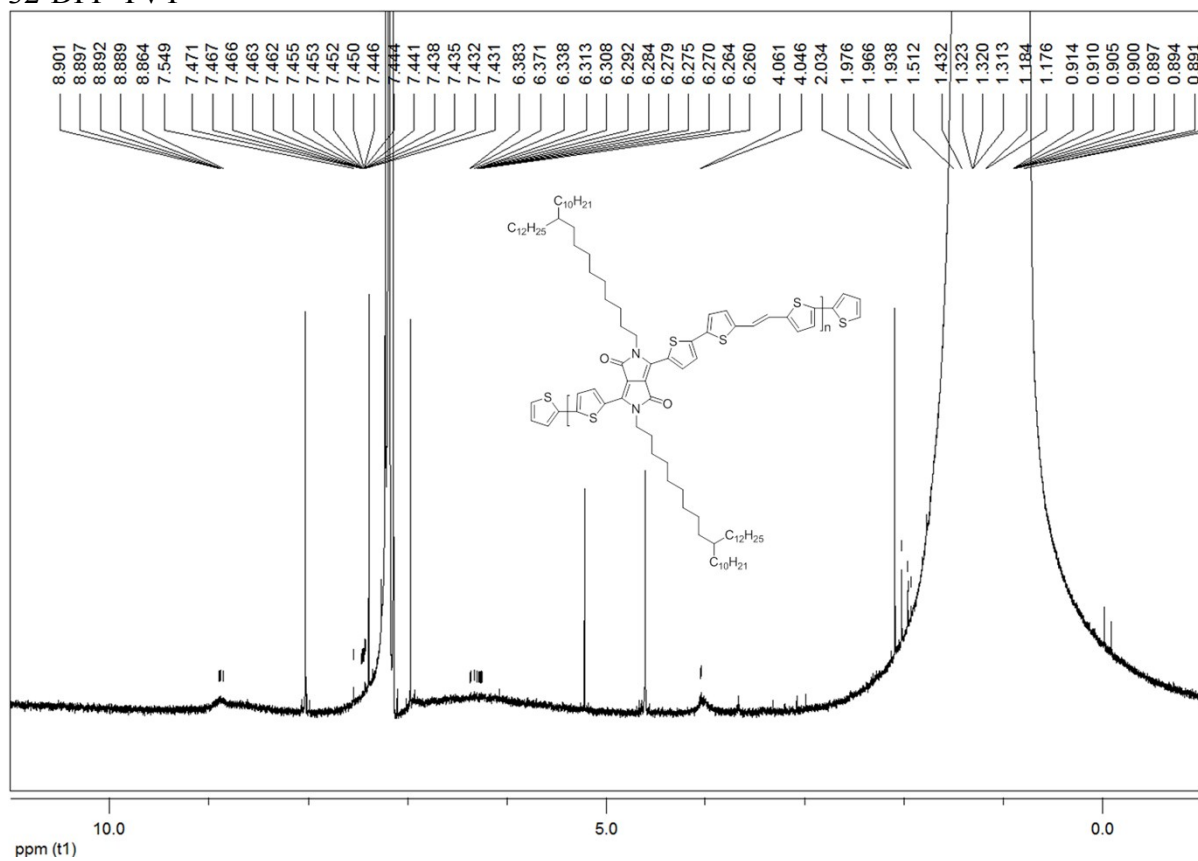

**Figure S1.** <sup>1</sup>H-NMR of DPP-TVT polymers

**25DPPTVT**

Element Anal.  $C_{74}H_{112}N_2O_2S_4$  Cal: C, 74.75; H, 9.43; N, 2.36; S, 10.77; Found: C, 72.11; H, 9.28; N, 2.23; S, 10.69.

**27DPPTVT**

Element Anal.  $C_{78}H_{120}N_2O_2S_4$  Cal: C, 75.24; H, 9.65; N, 2.25; S, 10.29; Found: C, 70.44; H, 9.23; N, 2.13; S, 9.13.

**29DPPTVT**

Element Anal.  $C_{82}H_{128}N_2O_2S_4$  Cal: C, 75.69; H, 9.85; N, 2.15; S, 9.85; Found: C, 74.16; H, 10.30; N, 1.89; S, 8.73.

**31DPPTVT**

Element Anal.  $C_{86}H_{136}N_2O_2S_4$  Cal: C, 76.11; H, 10.03; N, 2.06; S, 9.44; Found: C, 74.05; H, 10.41; N, 1.92; S, 8.34.

**26DPPTVT**

Element Anal.  $C_{76}H_{116}N_2O_2S_4$  Cal: C, 75.00; H, 9.54; N, 2.30; S, 10.53; Found: C, 74.5; H, 9.46; N, 2.41; S, 11.29.

**28DPPTVT**

Element Anal.  $C_{80}H_{124}N_2O_2S_4$  Cal: C, 75.47; H, 9.75; N, 2.20; S, 10.06; Found: C, 75.08; H, 9.98; N, 2.16; S, 9.62.

**30DPPTVT**

Element Anal.  $C_{84}H_{132}N_2O_2S_4$  Cal: C, 75.90; H, 9.94; N, 2.11; S, 9.64; Found: C, 70.14; H, 9.67; N, 1.92; S, 8.53.

**32DPPTVT**

Element Anal.  $C_{88}H_{140}N_2O_2S_4$  Cal: C, 76.30; H, 10.12; N, 2.02; S, 9.25; Found: C, 72.28; H, 9.93; N, 1.97; S, 8.89.

**Figure S2.** Quantitative elemental analysis of DPP-TVT polymers

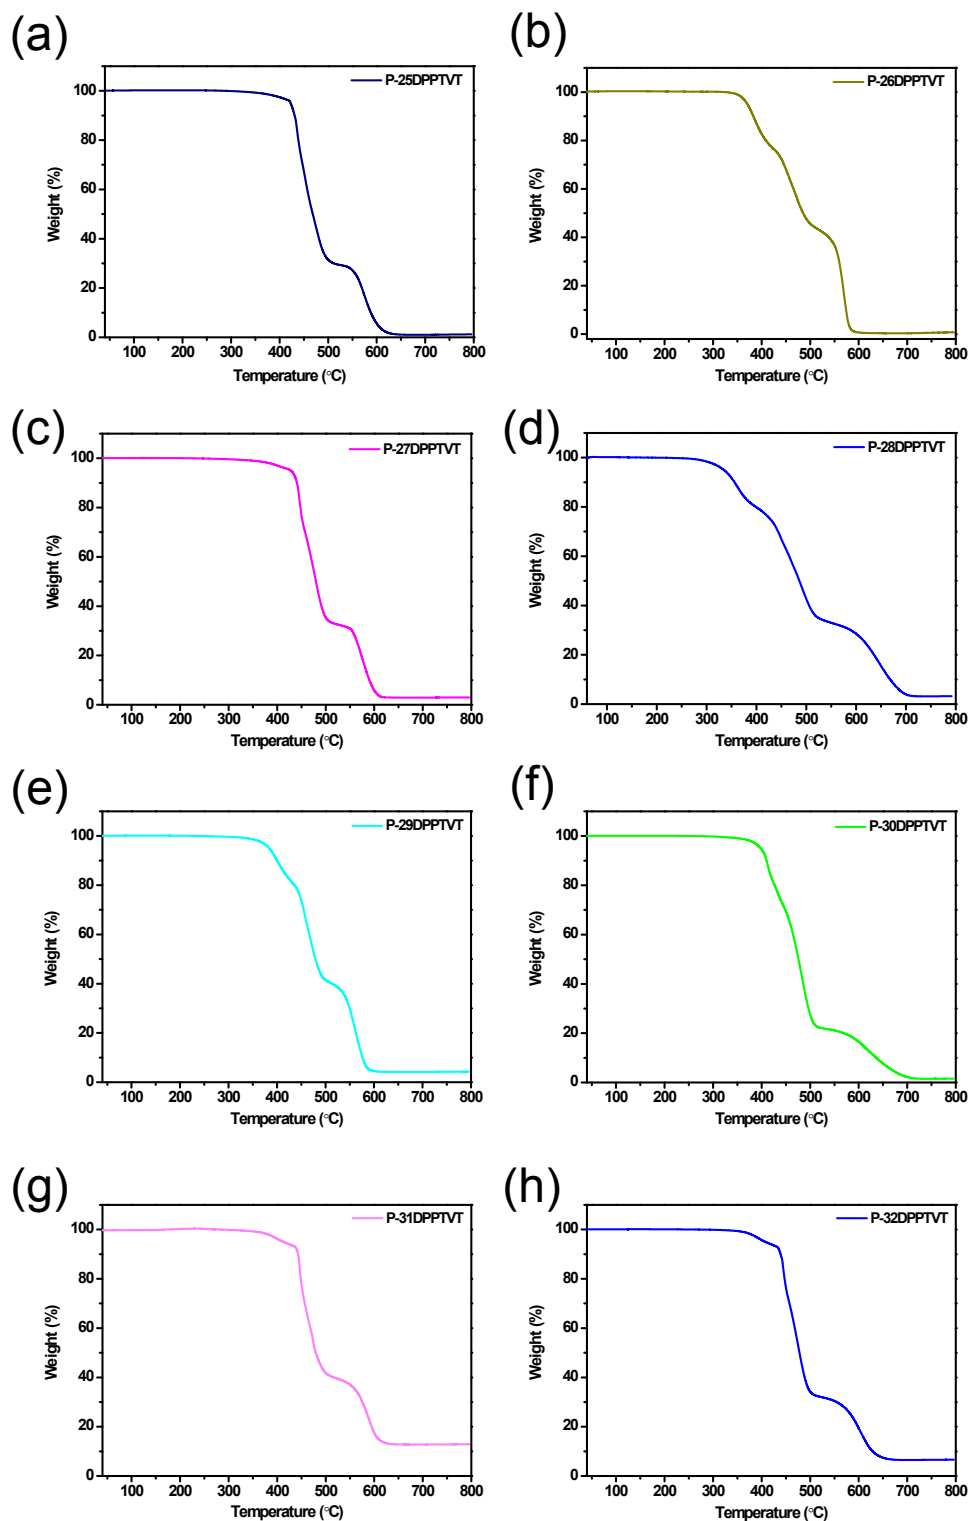

**Figure S3.** TGA thermograms of DPP-TV T polymers

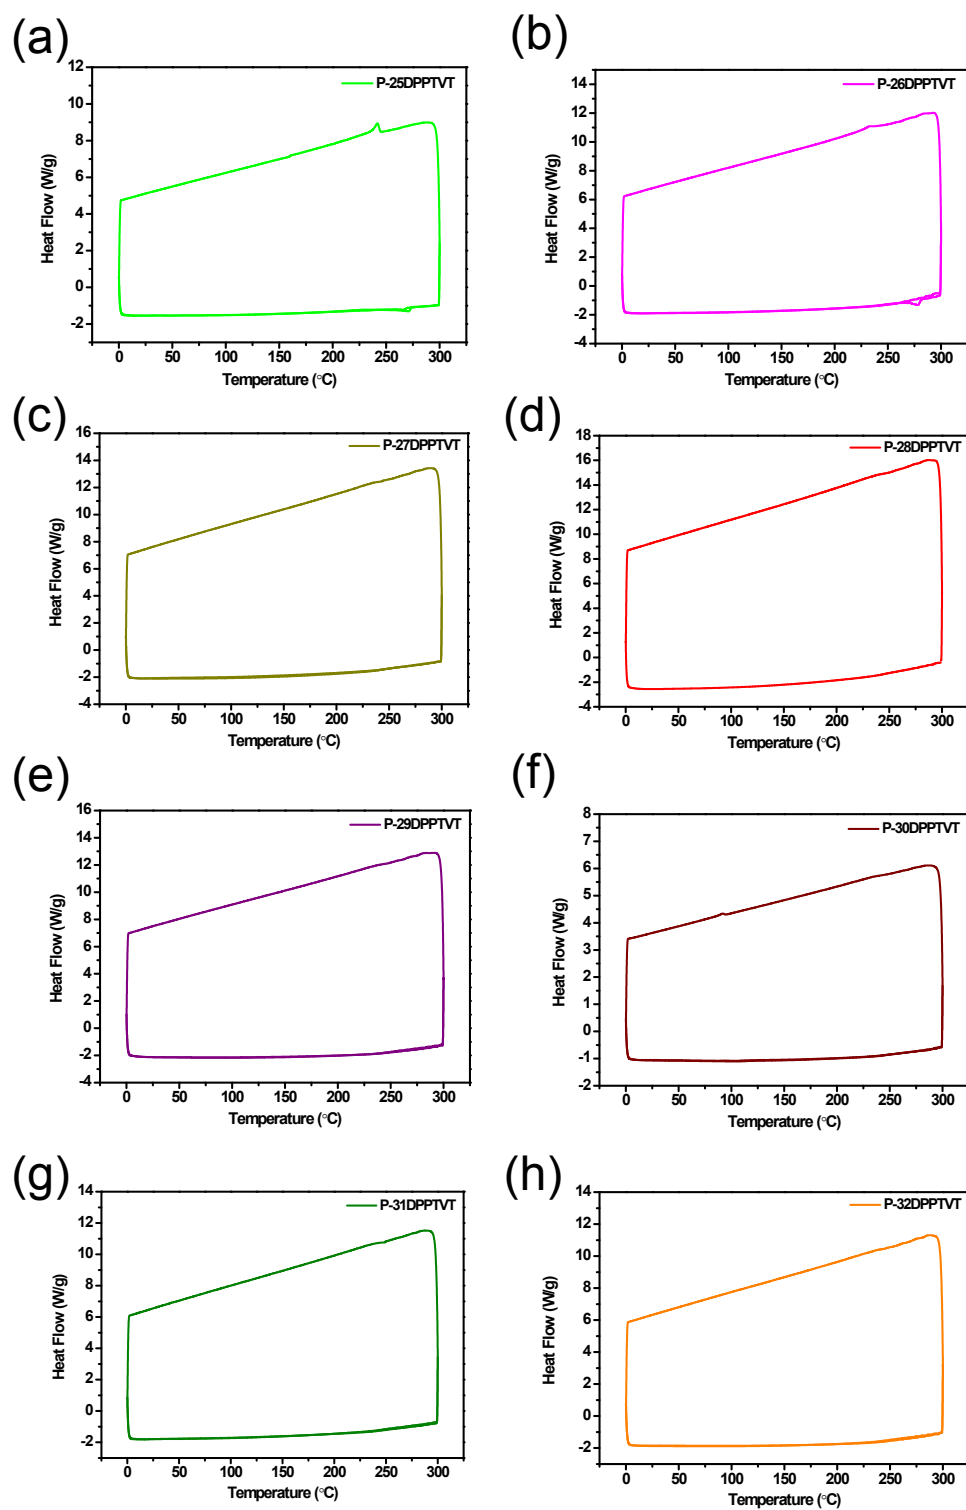

**Figure S4.** DSC thermograms of DPP-TVT polymers

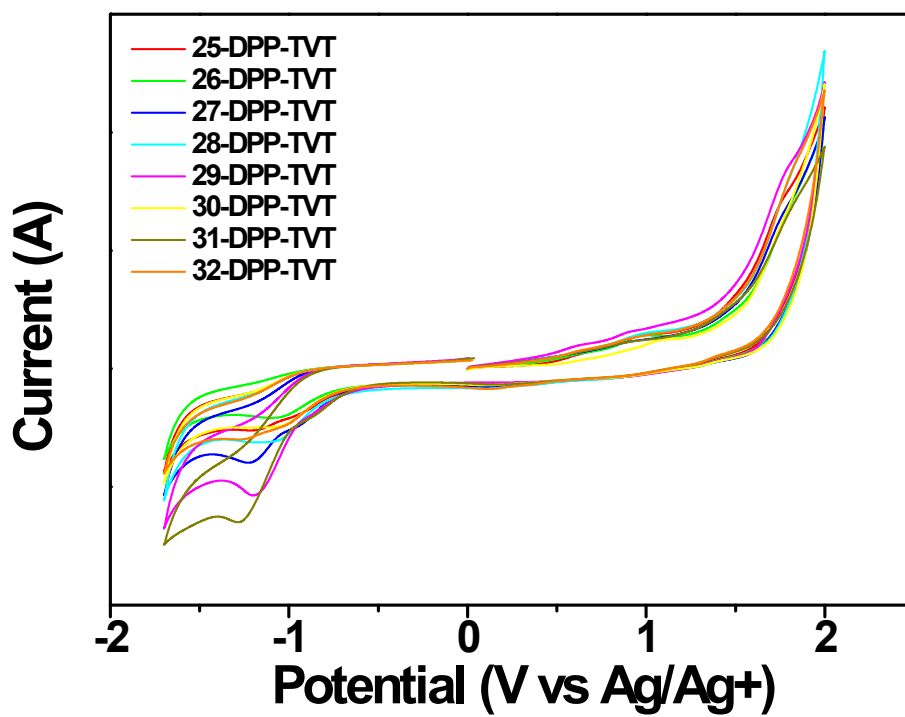

**Figure S5.** Cyclic voltammometry plots of DPP-TVT polymers in acetonitrile solution.

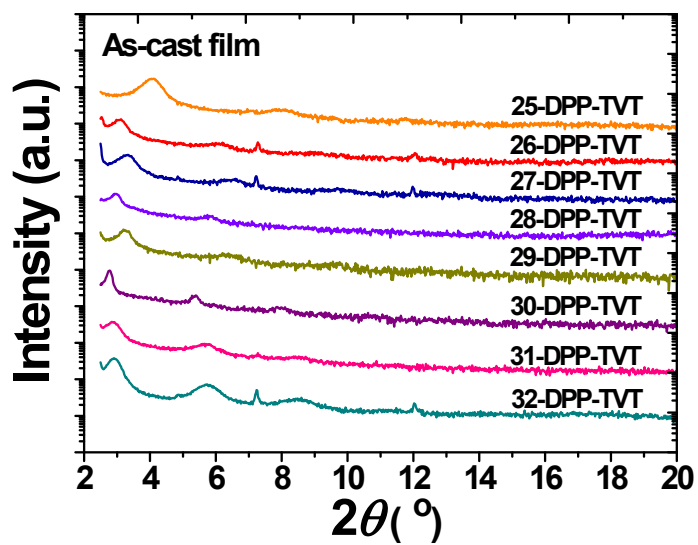

**Figure S6.** Out-of-plane X-ray diffraction (XRD) diffractogram profiles of the as-cast DPP-TVT polymer films.

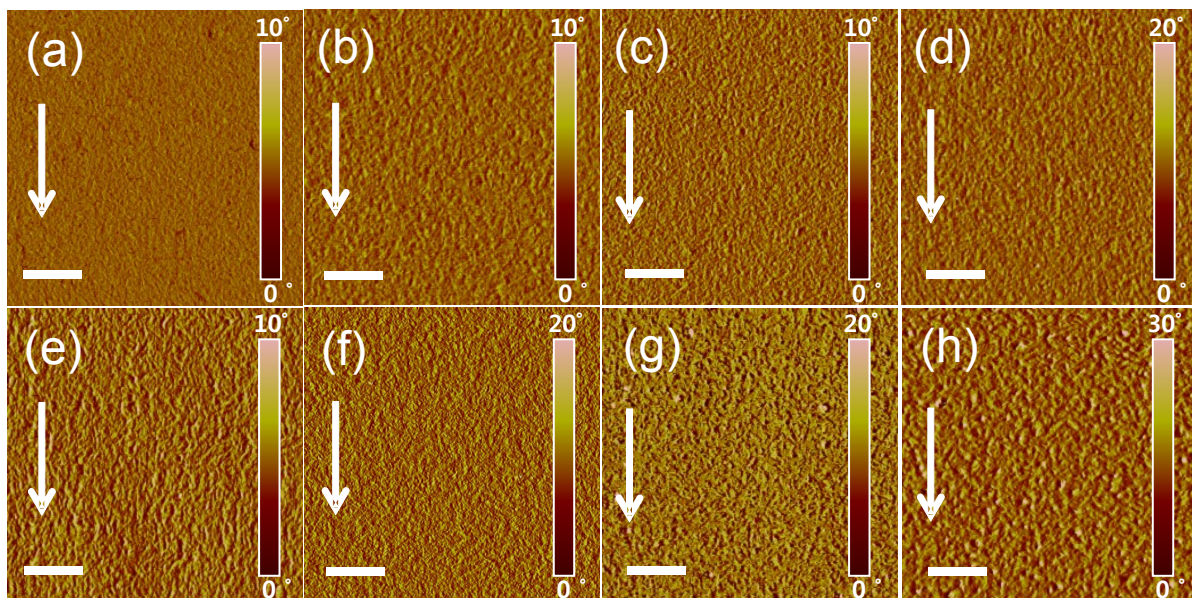

**Figure S7.** AFM phase image of DPP-TVT polymer films annealed at 200 °C. Solution-sheared film of (a) 25-DPP-TVT, (b) 26-DPP-TVT, (c) 27-DPP-TVT, (d) 28-DPP-TVT, (e) 29-DPP-TVT, (f) 30-DPP-TVT, (g) 31-DPP-TVT, and (h) 32-DPP-TVT. The shearing direction (top to bottom) is vertical to the scanning direction (left to right). The arrow indicates the direction of shearing. The scale bars represent 1  $\mu\text{m}$ .



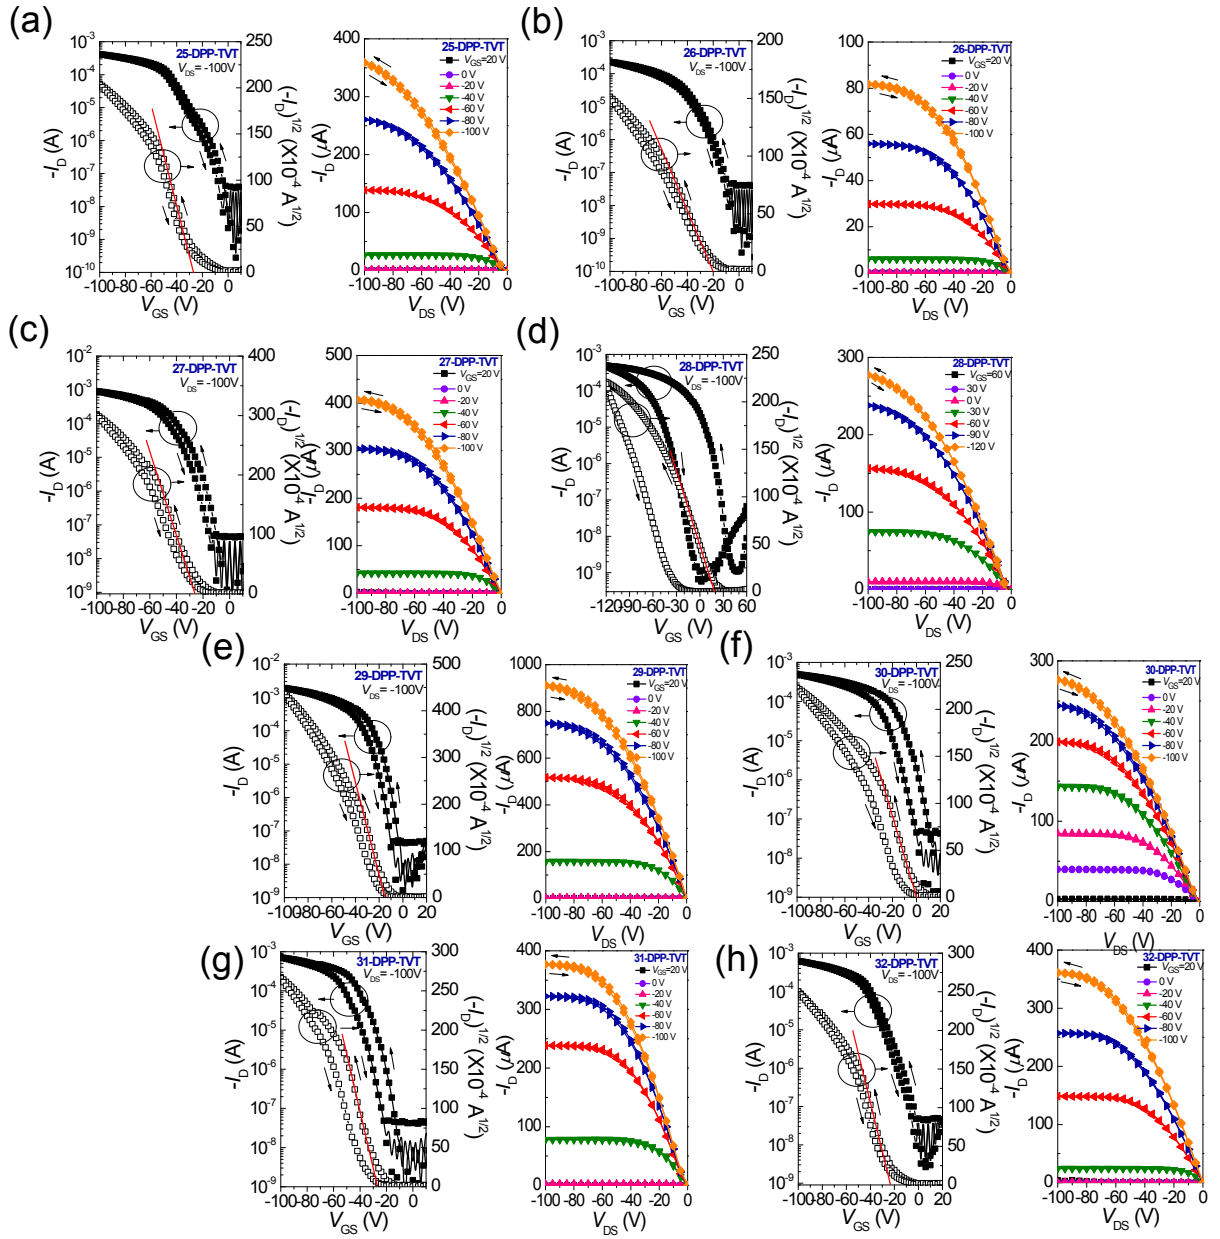

**Figure S8.** Transfer and output curves of DPP-TVT FETs obtained from solution-shearing: (a) 25-DPP-TVT, (b) 26-DPP-TVT, (c) 27-DPP-TVT, (d) 28-DPP-TVT, (e) 29-DPP-TVT, (f) 30-DPP-TVT, (g) 31-DPP-TVT, and (h) 32-DPP-TVT. The hole mobilities were calculated from the  $I$ - $V$  data set obtained using the range of 10 V in the gate voltage sweep.

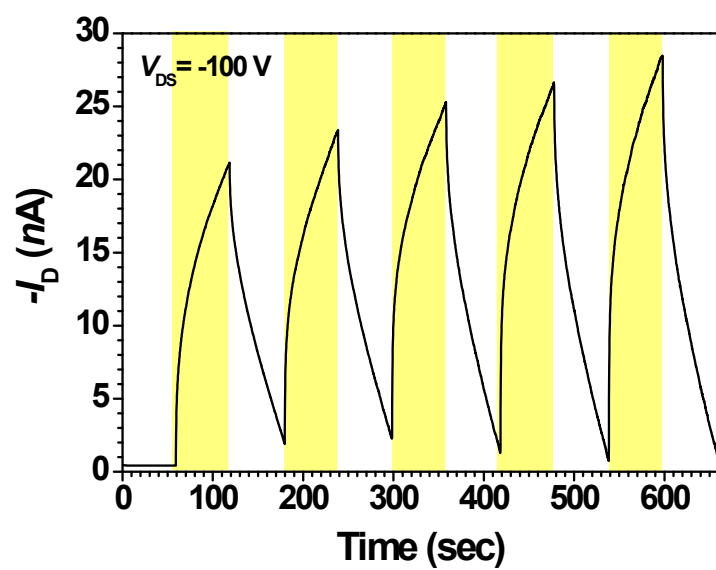

**Figure S9.** Photo-response test of the 29-DPP-TVT FETs upon on-and-off switching of polychromatic light ( $\lambda = 450 - 650 \text{ nm}$ ,  $\lambda_{\text{max}} = 640 \text{ nm}$ ,  $P_{\text{max}} = 36 \text{ mWcm}^{-2}$ ) at the transistor off-state ( $V_{GS} = 0 \text{ V}$  and  $V_{DS} = -100 \text{ V}$ ).

**Table S1.** TGA and DSC data of DPP-TVT polymers

| <b>Polymer</b> | <b>TGA <sup>a)</sup><br/>T<sub>d</sub></b> | <b>DSC<br/>T<sub>g</sub></b> | <b>DSC<br/>T<sub>m</sub></b> | <b>DSC<br/>T<sub>c</sub></b> |
|----------------|--------------------------------------------|------------------------------|------------------------------|------------------------------|
| 25-DPP-TVT     | 422.6                                      | -                            | 270.9                        | 241.6                        |
| 26-DPP-TVT     | 370.7                                      | -                            | 278.7                        | 232.0                        |
| 27-DPP-TVT     | 428.0                                      | -                            | -                            | -                            |
| 28-DPP-TVT     | 334.7                                      | -                            | -                            | -                            |
| 29-DPP-TVT     | 383.9                                      | -                            | -                            | -                            |
| 30-DPP-TVT     | 397.9                                      | -                            | -                            | -                            |
| 31-DPP-TVT     | 412.8                                      | -                            | -                            | -                            |
| 32-DPP-TVT     | 407.6                                      | -                            | -                            | -                            |

<sup>a)</sup>The temperature of 5% weight-loss under nitrogen.

**Table S2.** Peak assignments for the out-of-plane XRD diffractogram profiles obtained from the as-cast DPP-TVT polymer films.

| Polymer    | (n00) | $2\theta$ (°) | $d(100)$ -spacing (Å) |
|------------|-------|---------------|-----------------------|
| 25-DPP-TVT | (100) | 4.04          | 21.85                 |
|            | (200) | 8.04          | -                     |
|            | (300) | 11.82         | -                     |
|            | (400) | -             | -                     |
| 26-DPP-TVT | (100) | 3.12          | 28.28                 |
|            | (200) | 6.10          | -                     |
|            | (300) | -             | -                     |
|            | (400) | -             | -                     |
| 27-DPP-TVT | (100) | 3.34          | 26.42                 |
|            | (200) | 6.50          | -                     |
|            | (300) | 9.94          | -                     |
|            | (400) | -             | -                     |
| 28-DPP-TVT | (100) | 2.98          | 29.62                 |
|            | (200) | 5.78          | -                     |
|            | (300) | -             | -                     |
|            | (400) | -             | -                     |
| 29-DPP-TVT | (100) | 3.20          | 27.58                 |
|            | (200) | 6.38          | -                     |
|            | (300) | 9.72          | -                     |
|            | (400) | -             | -                     |
| 30-DPP-TVT | (100) | 2.87          | 30.81                 |
|            | (200) | 5.40          | -                     |
|            | (300) | 7.98          | -                     |
|            | (400) | -             | -                     |
| 31-DPP-TVT | (100) | 2.83          | 31.18                 |
|            | (200) | 5.70          | -                     |
|            | (300) | 8.52          | -                     |
|            | (400) | -             | -                     |
| 32-DPP-TVT | (100) | 2.90          | 30.43                 |
|            | (200) | 5.74          | -                     |
|            | (300) | 8.60          | -                     |
|            | (400) | -             | -                     |

## References

- S1. T. L. Nelson, T. M. Young, J. Y. Liu, S. P. Mishra, J. A. Belot, C. L. Balliet, A. E. Javier, T. Kowalewski and R. D. McCullough, *Adv. Mater.*, 2010, **22**, 4617-4621.
- S2. S. C. Ng, H. S. O. Chan, T. T. Ong, K. Kumura, Y. Mazaki and K. Kobayashi, *Macromolecules*, 1998, **31**, 1221-1228.
- S3. J. Y. Back, H. Yu, I. Song, I. Kang, H. Ahn, T. J. Shin, S.-K. Kwon, J. H. Oh and Y.-H. Kim, *Chem. Mater.*, 2015, **27**, 1732-1739.
